# Supplementary material for: Multianvil high-pressure/high-temperature synthesis and characterization of magnetoelectric HP-Co3TeO6
Source: Royal Society of Chemistry journal article supplement (doi:10.1039/d0tc05210h), 2021-01-01
Supplement: d0tc05210h1.pdf [file d0tc05210h1.pdf]

### Supporting Information

## Multianvil High-Pressure/High-Temperature Synthesis and Characterization of magnetoelectric HP-Co<sub>3</sub>TeO<sub>6</sub>

Elisabeth Selb<sup>a</sup>, Toni Buttler<sup>b</sup>, Oliver Janka<sup>c</sup>, Martina Tribus<sup>d</sup>, Stefan G. Ebbinghaus<sup>b</sup> and Gunter Heymann<sup>\*a</sup>

### X-ray powder diffraction and Rietveld refinement:

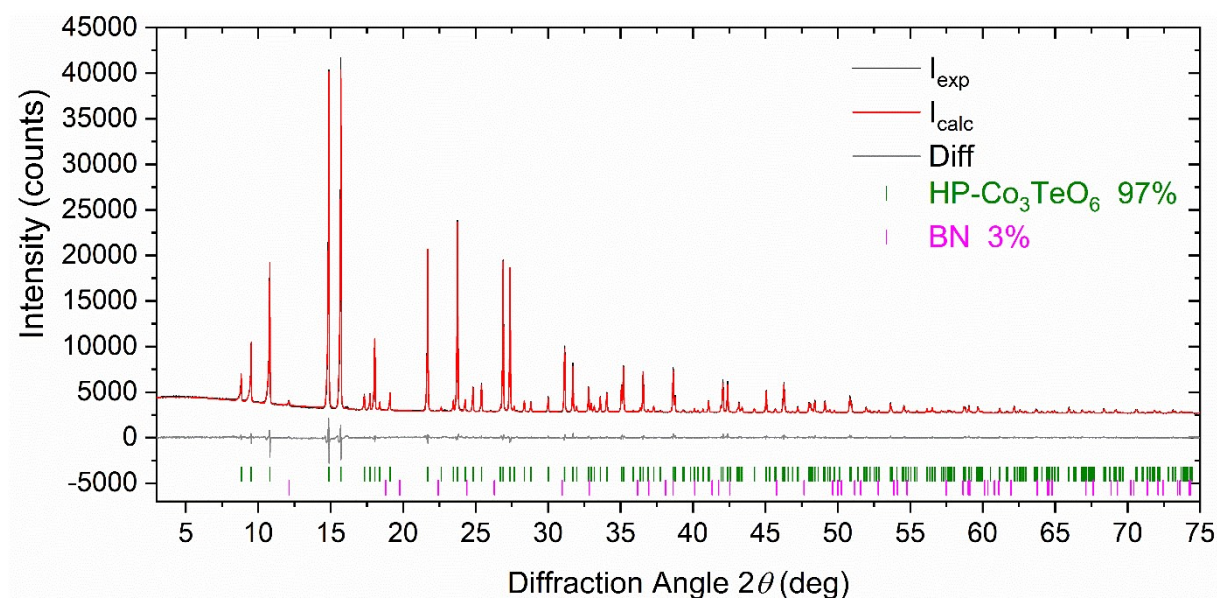

**Figure S11.** XRD pattern (Mo- $K_{\alpha 1}$  radiation) and Rietveld refinement of HP-Co<sub>3</sub>TeO<sub>6</sub> ( $R_{\text{exp}} = 3.41$ ,  $R_{\text{wp}} = 6.40$ ,  $R_p = 4.83$ , and  $GOF = 1.88$ ). The curve of the experimental and calculated diffraction data are plotted with an offset of 2500 counts to better separate them from the difference curve.

### Additional crystal structure data:

**Table S11:** Anisotropic displacement parameters ( $\text{\AA}^2$ ) for HP-Co<sub>3</sub>TeO<sub>6</sub>, ( $R3$ , standard deviations in parentheses).

| Atom | $U_{11}$   | $U_{22}$   | $U_{33}$   | $U_{23}$   | $U_{13}$   | $U_{12}$   |
|------|------------|------------|------------|------------|------------|------------|
| Te   | 0.00439(9) | 0.00439(9) | 0.0049(2)  | 0          | 0          | 0.00220(5) |
| Co1  | 0.0069(2)  | 0.0069(2)  | 0.0070(4)  | 0          | 0          | 0.0034 (1) |
| Co2  | 0.0064(2)  | 0.0064(2)  | 0.0099(12) | 0          | 0          | 0.00322(8) |
| Co3  | 0.0062(2)  | 0.0062(2)  | 0.0103(5)  | 0          | 0          | 0.0031 (1) |
| O1   | 0.006(1)   | 0.008(2)   | 0.008(1)   | -0.0007(8) | 0.0002(8)  | 0.0032(9)  |
| O2   | 0.008(2)   | 0.007 (2)  | 0.0071(9)  | -0.0013(8) | -0.0022(8) | 0.003 (1)  |

**Table SI2.** Selected interatomic distances (pm) of HP-Co<sub>3</sub>TeO<sub>6</sub> and Ni<sub>3</sub>TeO<sub>6</sub><sup>1</sup> as well as bond length discrepancies (pm) within the TeO<sub>6</sub>-, CoO<sub>6</sub>- and NiO<sub>6</sub>-octahedra (standard deviations

| Bond lengths of HP-Co <sub>3</sub> TeO <sub>6</sub> |    |          |    | Bond lengths of Ni <sub>3</sub> TeO <sub>6</sub> <sup>1</sup> |    |           |    | Bond length discrepancy per octahedra for HP-Co <sub>3</sub> TeO <sub>6</sub> /Ni <sub>3</sub> TeO <sub>6</sub> |  |
|-----------------------------------------------------|----|----------|----|---------------------------------------------------------------|----|-----------|----|-----------------------------------------------------------------------------------------------------------------|--|
| Te:                                                 | O1 | 195.7(4) | 3× | Te:                                                           | O1 | 192.3 (5) | 3× | 4.3/ 3.3                                                                                                        |  |
|                                                     | O2 | 191.4(3) | 3× |                                                               | O2 | 195.6 (5) | 3× |                                                                                                                 |  |
| Co1:                                                | O1 | 223.0(3) | 3× | Ni1:                                                          | O1 | 203.2 (6) | 3× | 18.1/ 11.6                                                                                                      |  |
|                                                     | O2 | 204.9(4) | 3× |                                                               | O2 | 214.8 (5) | 3× |                                                                                                                 |  |
| Co2:                                                | O1 | 203.7(4) | 3× | Ni2:                                                          | O1 | 204.0 (6) | 3× | 18.7/ 9.9                                                                                                       |  |
|                                                     | O2 | 222.4(3) | 3× |                                                               | O2 | 213.9 (7) | 3× |                                                                                                                 |  |
| Co3:                                                | O1 | 203.2(4) | 3× | Ni3:                                                          | O1 | 200.8 (6) | 3× | 15.7/ 10.2                                                                                                      |  |
|                                                     | O2 | 218.9(3) | 3× |                                                               | O2 | 211.0 (5) | 3× |                                                                                                                 |  |

in parentheses).

**Table SI3.** Selected interatomic angles (°) of HP-Co<sub>3</sub>TeO<sub>6</sub> and Ni<sub>3</sub>TeO<sub>6</sub><sup>1</sup>. Interatomic angle discrepancies (°), calculated on the deviation from the ideal value, are given in column 3 (standard deviations in parentheses).

| Interatomic angles of HP-Co <sub>3</sub> TeO <sub>6</sub> |          |    | Interatomic angles of Ni <sub>3</sub> TeO <sub>6</sub> <sup>1</sup> |          |    | Interatomic angle discrepancy for HP-Co <sub>3</sub> TeO <sub>6</sub> /Ni <sub>3</sub> TeO <sub>6</sub> |  |
|-----------------------------------------------------------|----------|----|---------------------------------------------------------------------|----------|----|---------------------------------------------------------------------------------------------------------|--|
| O1-Te-O1                                                  | 84.2(2)  | 3× | O1-Te-O1                                                            | 83.6(2)  | 3× | 5.8/ 6.4                                                                                                |  |
| O1-Te-O2                                                  | 87.1(2)  | 3× | O1-Te-O2                                                            | 86.8(3)  | 3× | 2.9/ 3.2                                                                                                |  |
| O1-Te-O2                                                  | 91.4(2)  | 3× | O1-Te-O2                                                            | 91.8(3)  | 3× | 1.4/ 1.8                                                                                                |  |
| O1-Te-O2                                                  | 170.6(2) | 3× | O1-Te-O2                                                            | 169.8(3) | 3× | 9.4/ 10.2                                                                                               |  |
| O2-Te-O2                                                  | 96.7(2)  | 3× | O2-Te-O2                                                            | 97.0(3)  | 3× | 3.3/ 3.0                                                                                                |  |
|                                                           |          |    |                                                                     |          |    |                                                                                                         |  |
| O1-Co1-O1                                                 | 72.1(2)  | 3× | O1-Ni1-O1                                                           | 74.8(2)  | 3× | 17.9/ 15.2                                                                                              |  |
| O1-Co1-O2                                                 | 86.9(2)  | 3× | O1-Ni1-O2                                                           | 87.8(3)  | 3× | 3.1/ 2.2                                                                                                |  |
| O1-Co1-O2                                                 | 88.3(2)  | 3× | O1-Ni1-O2                                                           | 89.5(3)  | 3× | 1.7/ 0.5                                                                                                |  |
| O1-Co1-O2                                                 | 154.6(2) | 3× | O1-Ni1-O2                                                           | 159.0(3) | 3× | 25.4/ 21.0                                                                                              |  |
| O2-Co1-O2                                                 | 106.9(2) | 3× | O2-Ni1-O2                                                           | 104.0(3) | 3× | 16.9/ 14.9                                                                                              |  |
|                                                           |          |    |                                                                     |          |    |                                                                                                         |  |
| O1-Co2-O1                                                 | 101.4(2) | 3× | O1-Ni2-O1                                                           | 99.5(3)  | 3× | 11.4/ 9.5                                                                                               |  |
| O1-Co2-O2                                                 | 87.3(2)  | 3× | O1-Ni2-O2                                                           | 87.9(3)  | 3× | 2.7/ 2.1                                                                                                |  |
| O1-Co2-O2                                                 | 88.9(2)  | 3× | O1-Ni2-O2                                                           | 89.9(3)  | 3× | 2.1/ 1.1                                                                                                |  |

|           |          |    |           |          |    |            |
|-----------|----------|----|-----------|----------|----|------------|
| O1-Co2-O2 | 164.7(2) | 3× | O1-Ni2-O2 | 166.9(3) | 3× | 15.3/ 13.1 |
| O2-Co2-O2 | 80.2(2)  | 3× | O2-Ni2-O2 | 81.2(3)  | 3× | 9.8/ 8.8   |
| O1-Co3-O1 | 106.4(2) | 3× | O1-Ni3-O1 | 103.5(3) | 3× | 16.4/ 13.5 |
| O1-Co3-O2 | 78.3(2)  | 3× | O1-Ni3-O2 | 80.7(3)  | 3× | 12.7/ 9.3  |
| O1-Co3-O2 | 90.8(2)  | 3× | O1-Ni3-O2 | 91.5(3)  | 3× | 0.8/ 1.5   |
| O1-Co3-O2 | 159.6(2) | 3× | O1-Ni3-O2 | 162.8(3) | 3× | 20.4/ 17.2 |
| O2-Co3-O2 | 81.8(2)  | 3× | O2-Ni3-O2 | 82.6(3)  | 3× | 8.2/ 7.4   |

### Band gap determination

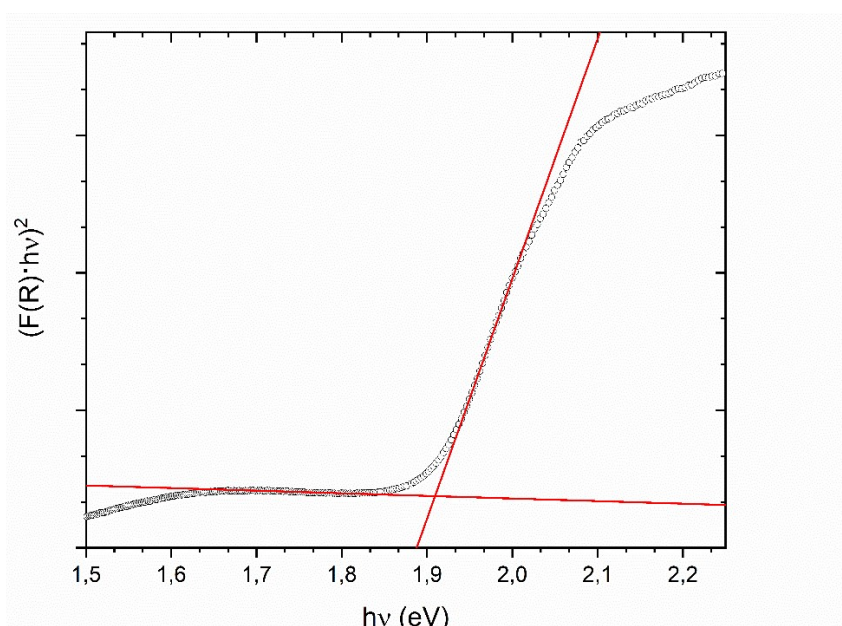

**Figure SI2.** Tauc plot for the band gap determination with  $n = 2$ .

### Low field magnetic measurements

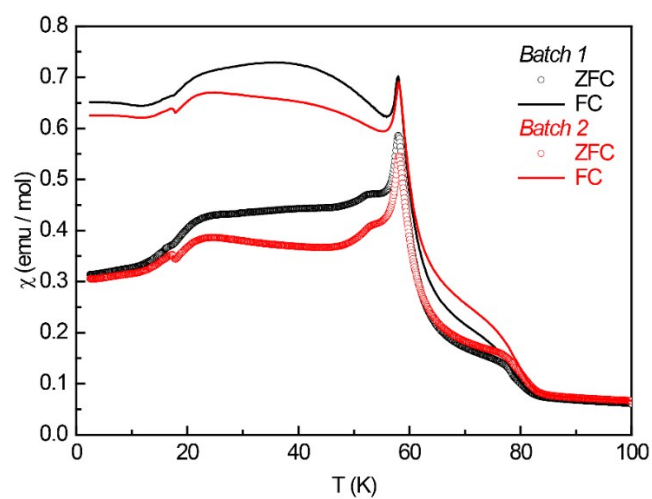

**Figure SI3.** Zero-field-cooled / field-cooled data (ZFC/FC) of HP-Co<sub>3</sub>TeO<sub>6</sub> measured at 100 Oe.

### Specific heat

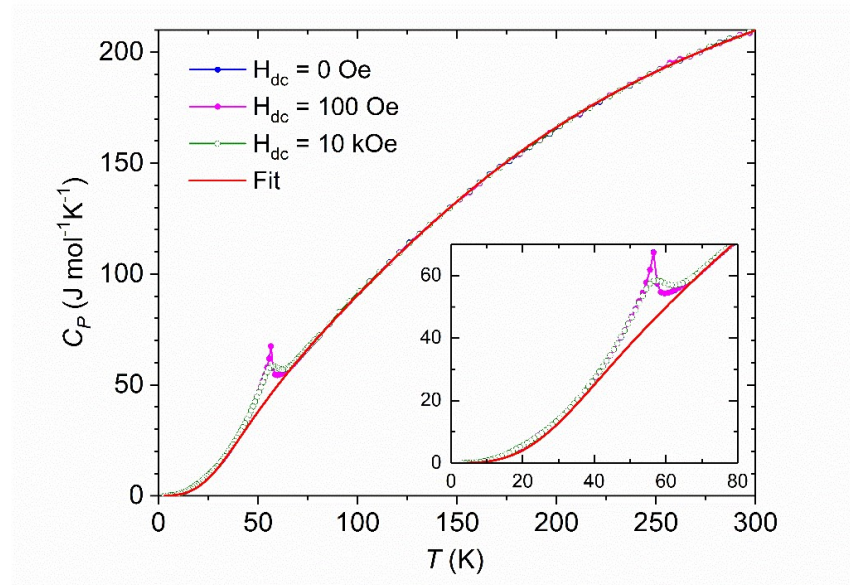

**Figure SI4.** Temperature dependence of the specific heat of HP-Co<sub>3</sub>TeO<sub>6</sub> at  $H_{dc} = 0$  Oe, 100 Oe and 10 kOe plus Einstein-Debye fit (red line) of the phonon contribution. Values at 0 Oe and 100 Oe are very similar and therefore not distinguishable.

### Magnetoelectric properties

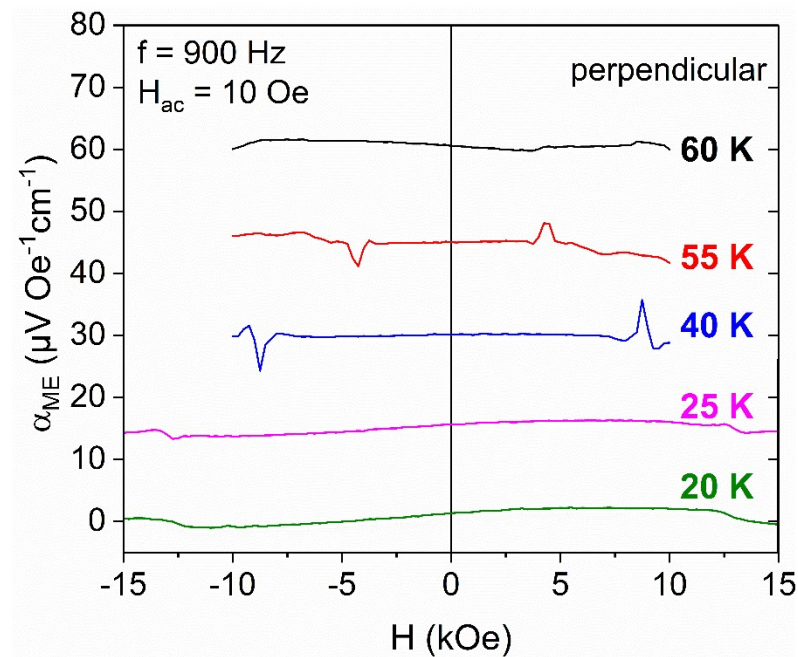

**Figure SI5.** Field dependence of the perpendicular magnetoelectric coefficient measured at different temperatures. Values recorded above 20 K are depicted with an offset.

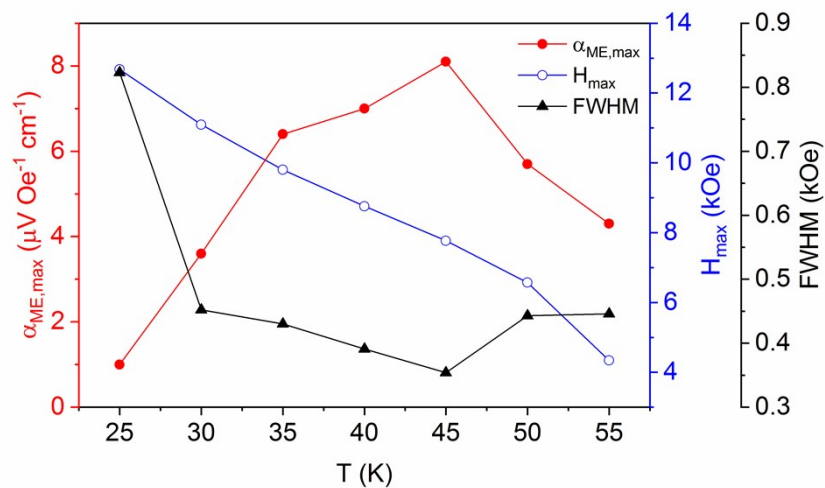

**Figure S16.** Amplitude, field position and full width at half maximum of the  $\alpha_{ME}$  peak measured in perpendicular geometry.

1. R. Becker and H. Berger, *Acta Crystallogr. E*, 2006, **62**, i222-i223.
